# Apparent role of *Tribolium orthodenticle* in anteroposterior blastoderm patterning largely reflects novel functions in dorsoventral axis formation and cell survival

Kay Kotkamp\*, Martin Klingler and Michael Schoppmeier†

## SUMMARY

In the short-germ beetle *Tribolium castaneum*, the head gap gene *orthodenticle* (*Tc-otd*) has been proposed to functionally substitute for *bicoid*, the anterior morphogen unique to higher dipterans. In this study we reanalyzed the function of *Tc-otd*. We obtained a similar range of cuticle phenotypes as in previously described RNAi experiments; however, we noticed unexpected effects on blastodermal cell fates. First, we found that *Tc-otd* is essential for dorsoventral patterning. RNAi depletion results in lateralized embryos, a fate map change that by itself can explain the observed loss of the anterior head, which is a ventral anlage in *Tribolium*. We find that this effect is due to diminished expression of *short gastrulation* (*sog*), a gene essential for establishment of the Decapentaplegic (Dpp) gradient in this species. Second, we found that gnathal segment primordia in *Tc-otd* RNAi embryos are shifted anteriorly but otherwise appear patterned normally. This anteroposterior (AP) fate map shift might largely be due to diminished *zen-1* expression and is not responsible for the severe segmentation defects observed in some *Tc-otd* RNAi embryos. As neither *Tc-sog* nor *Tc-zen-1* probably requires Otd gradient-mediated positional information, we posit that the blastoderm function of *Tc-Otd* depends on its initial homogeneous maternal expression and that this maternal factor does not provide significant positional information for *Tribolium* blastoderm embryos.

**KEY WORDS:** *Tribolium*, Short-germ insect, Anteroposterior patterning, Dorsoventral patterning, Orthodenticle, Bicoid

## INTRODUCTION

Morphogenesis in *Drosophila* is a result of progressive subdivision of the embryo along the dorsoventral (DV) and anteroposterior (AP) axes. Development of each of these axes is initiated by maternally supplied factors and development proceeds largely independently along the two axes (Lall and Patel, 2001). DV polarity in *Drosophila* depends on the nuclear concentration gradient of the Dorsal transcription factor, which subdivides the embryo into a series of domains with different fates: amnioserosa, dorsal ectoderm, neurogenic ectoderm and mesoderm. The boundaries of these domains are established by the activities of zygotic genes transcribed at different thresholds of the Dorsal protein (Moussian and Roth, 2005; Stathopoulos and Levine, 2002). One zygotic target of Dorsal is the gene *decapentaplegic* (*dpp*), encoding a bone morphogenetic protein (BMP) homolog. Dpp specifies at high levels the extra-embryonic amnioserosa, whereas moderate BMP levels mediate dorsal ectoderm (Moussian and Roth, 2005; Stathopoulos and Levine, 2002). At more-ventral positions, BMP activity is inhibited by Short gastrulation (Sog) and Brinker (Brk), which allow neuroectoderm specification (Ashe and Levine, 1999; Biehs et al., 1996; Marques et al., 1997). Whereas Brinker is dispensable for *Tribolium* embryogenesis, Sog is essential to direct Dpp activity towards the dorsal side of the embryo, and the depletion of *sog* leads to the complete loss of neurogenic tissue (van der Zee et al., 2006).

*Drosophila* AP axis formation depends on spatial gradients of the maternal transcription factors Bicoid (Bcd) and Hunchback (Hb) (St Johnston and Nusslein-Volhard, 1992). Bcd activates multiple target genes, including gap and pair-rule genes (Blankenship and Wieschaus, 2001; Driever and Nusslein-Volhard, 1988; Gao and Finkelstein, 1998; Hulskamp et al., 1990; Rivera-Pomar et al., 1995; Small et al., 1992). In the absence of Bcd, the head, thorax and a subset of abdominal segments fail to develop and anterior terminal structures are transformed to a posterior fate (Driever and Nusslein-Volhard, 1988). However, although Bcd is essential to anterior patterning in *Drosophila*, no *bcd* ortholog has been isolated in any organism apart from the higher dipterans (Brown et al., 2001; Stauber et al., 1999; Stauber et al., 2002; Richards et al., 2008). It has been alleged that *bcd* evolved through duplication of an ancestral *Hox-3/zen* homolog and that afterwards one copy, *zen*, retained its function in specifying extra-embryonic tissues (Stauber et al., 1999), whereas the other copy (*bcd*) acquired new features, resembling those of *orthodenticle* (*otd*; *oc* – FlyBase) (Finkelstein and Perrimon, 1990; Tahayato et al., 2003; Wimmer et al., 2000). In insects, *Otd* acts as a zygotic head gap gene (Cohen and Jurgens, 1990; Finkelstein and Perrimon, 1990; Finkelstein et al., 1990; Schinko et al., 2008; Schroder, 2003). Owing to this conserved function in head development and the Bcd-like DNA binding specificity, *Otd* has been proposed as an ancestral anterior patterning gene in insects (Lynch et al., 2006; Schroder, 2003; Wimmer et al., 2000).

In the short-germ beetle *Tribolium castaneum* (Klingler, 2004; Richards et al., 2008), two *otd*-related genes (*Tc-otd-1* and *Tc-otd-2*) were identified, of which only *Tc-otd-1* is expressed during early embryonic stages (Schroder, 2003). Although *Tc-otd-1* mRNA is initially distributed uniformly, *Tc-Otd-1* later withdraws from the posterior pole resulting in a transient anterior-to-posterior protein

Department of Biology, Developmental Biology Unit, Erlangen University, Staudstrasse 5, 90158 Erlangen, Germany.

\*Present address: Institute Biology 1, Developmental Biology, University of Freiburg, Hauptstraße 1, D-79104 Freiburg, Germany

†Author for correspondence (mschoppm@biologie.uni-erlangen.de)

gradient (Schroder, 2003). As development proceeds, Tc-Otd-1 also retracts from the anterior pole, forming a domain that covers the anterior head, resembling *otd* expression in *Drosophila* (Cohen and Jurgens, 1990; Finkelstein and Perrimon, 1990; Finkelstein et al., 1990; Schinko et al., 2008; Schroder, 2003). In *Drosophila*, depletion of *otd* results in the deletion of the ocular and the antennal segments (Cohen and Jurgens, 1990; Finkelstein and Perrimon, 1990; Finkelstein et al., 1990). A comparable phenotype has been described for *Tribolium* after knockdown of zygotic *Tc-otd-1* by late blastodermal dsRNA injection (Schinko et al., 2008). Thus, it is feasible to assume that the zygotic function of *otd* in patterning pregnathal segments is conserved among these insects (Schinko et al., 2008).

Knocking down *Tc-otd-1* by parental RNAi results in larvae that are depleted of anterior segments (Schinko et al., 2008; Schroder, 2003). This segmentation phenotype is enhanced by the combined knockdown of *Tc-otd-1* and *Tc-hb*, which led to the proposition that Otd and Hb might substitute for Bcd as anterior morphogens in non-dipteran insects (Schroder, 2003). This idea is supported by functional studies in the long-germ wasp *Nasonia*, where *hb* and *otd* are crucial to early patterning (Lynch et al., 2006; Pultz et al., 2005). However, recent work in *Tribolium* suggests that *hunchback* functions in abdominal metamerization only, whereas in the head and thorax it regulates segment identity (Marques-Souza et al., 2008), raising the question whether Otd can indeed provide concentration-dependent positional information, i.e. act as a Bcd-like morphogen, during *Tribolium* blastoderm patterning.

In this study, we investigated the role of *orthodenticle* during early *Tribolium* development. Surprisingly, we found that *Tc-otd-1* RNAi results in cell lethality already during the differentiated blastoderm stage. To elucidate whether this phenotype is due to disruption of early AP patterning, we monitored gap and pair-rule gene expression patterns throughout blastoderm stages. We found that patterning of gnathal and thoracic segment primordia is not severely affected, whereas the anlagen of the pregnathal head and the serosa are reduced in size. Unexpectedly, we found *Tc-otd-1* RNAi also to have a major impact on DV patterning. We identified *Tc-zen-1* and *Tc-sog* as major target genes of Tc-Otd-1. Both genes, however, are unlikely to receive concentration-dependent positional input from Tc-Otd-1. Instead, Tc-Otd-1 appears to provide a more general function in AP and DV axis formation during *Tribolium* short-germ development.

## MATERIALS AND METHODS

### Histology

Fixation, single in situ hybridization and immunofluorescence staining were performed using standard protocols (Patel et al., 1989; Tautz and Pfeifle, 1989). For double staining, fluorescein- and digoxigenin-labeled probes were detected using alkaline phosphatase and beta-galactosidase, the latter after signal enhancement via biotin deposition (Prpic et al., 2001). The rabbit polyclonal pMAD antibody (gift of Dr Morata, Centro de Biología Molecular, Madrid, Spain) was used at a concentration of 1:3000. An alkaline-phosphatase-conjugated goat anti-rabbit antibody (1:2000, Dianova) was used for detection. Embryos were subsequently counterstained with Hoechst 33342. TUNEL assays were performed as previously described (Prpic and Damen, 2005). A detailed protocol is available from the authors.

### RNAi

Parental RNAi was performed as described (Bucher and Klingler, 2004; Bucher et al., 2002). For *Tc-otd-1* dsRNA synthesis, the previously described full-length clone (Schroder, 2003) and two non-overlapping PCR fragments were used as a template. RNAi for all three fragments yielded identical *Tc-otd-1* RNAi phenotypes, excluding the possibility that an

unrelated gene was affected. *Tc-sog* and *Tc-zen-1* dsRNAs were produced from previously described clones (Falciani et al., 1996; van der Zee et al., 2005). Double-stranded RNAs were injected into female pupae at a concentration of 1 µg/µl (*Tc-otd-1* and *Tc-zen-1*). To produce a phenotypic series of *Tc-sog* RNAi phenotypes, dsRNA at concentration of 0.2 µg/µl was injected. Females were mated with wild-type males and reared under standard conditions.

### Cuticle preparation

First instar larvae were cleared in lactic acid in 10% ethanol overnight at 60°C. Cuticles were transferred to a drop of lactic acid on a slide. The cuticular autofluorescence was detected on a Zeiss Axiophot microscope and maximum projection images were created from *z* stacks using the Analysis D software (Olympus).

## RESULTS

### *Tc-otd-1* RNAi causes a fate map shift at the expense of the pregnathal region

Previous studies have indicated that the loss of *Tc-otd-1* function causes the deletion of anterior segments including pregnathal, gnathal and, in the strongest cases, even thoracic segments (Schinko et al., 2008; Schroder, 2003). However, these authors did not elucidate how Tc-Otd-1 affects the earliest stages of AP patterning. To understand how Tc-Otd-1 regulates the blastoderm fate map, we investigated the expression patterns of the *Tribolium* gap genes *hunchback* (*Tc-hb*), *giant* (*Tc-gt*), *knirps* (*Tc-kni*), *millepattes* (*Tc-mlpt*) and *Krüppel* (*Tc-Kr*) (Bucher and Klingler, 2004; Cerny et al., 2005; Cerny et al., 2008; Marques-Souza et al., 2008; Savard et al., 2006; Sommer and Tautz, 1993; Wolff et al., 1995) in *Tc-otd-1* RNAi embryos (Fig. 1).

In wild type, *Tc-hb* initially is expressed homogeneously. With the formation of the serosa, *Tc-hb* fades from the anterior head, which results in the formation of a serosal and a gnathal domain (Fig. 1A) (Wolff et al., 1995). Upon depletion of *Tc-otd-1*, the gnathal *Tc-hb* domain was shifted towards the anterior and the distance between this domain and the *hb* serosa domain was strongly reduced (Fig. 1A,B).

*Tc-gt* forms at the differentiated blastoderm stage an anterior domain comprising pregnathal and gnathal segments, but excluding the serosa (Fig. 1C) (Bucher and Klingler, 2004). In *Tc-otd-1* RNAi, this domain was shifted towards the anterior and its size was reduced (Fig. 1D). It appears that the less strongly expressing portion of the domain corresponding to the anterior head is reduced in size, whereas the strongly expressed gnathal part is less affected.

The expression of *Tribolium knirps* (*Tc-kni*) (Cerny et al., 2008) arises at the undifferentiated blastoderm stage in a rather broad central domain, which refines to a wedge-shaped domain covering the mandibular and pregnathal region (Fig. 1E). As for *Tc-gt* and *Tc-hb*, the depletion of *Tc-otd-1* resulted in a shift of *Tc-kni* expression towards the anterior and a concomitant reduction in size (Fig. 1F). These changes in *Tc-hb*, *Tc-gt* and *Tc-kni* expression suggest that *Tc-otd-1* RNAi embryos lack pregnathal anlagen already during early embryonic stages, whereas the gnathal region is expanded rather than reduced (see Fig. S2 in the supplementary material for *Tc-empty-spiracles* and *Tc-buttonhead* expression in *Tc-otd-1* RNAi). This coordinated shift of expression domains might extend to *Tribolium Krüppel* (Cerny et al., 2005; Sommer and Tautz, 1993), which appeared to expand toward the anterior in *Tc-otd-1*-depleted embryos (Fig. 1I-L).

Unlike anterior gap gene domains in *Drosophila bicoid* mutant embryos, none of these domains were lost in *Tc-otd-1* RNAi embryos. The anterior *Tc-mlpt* domain (Savard et al., 2006), however, was abolished by *Tc-otd-1* RNAi (Fig. 1H), indicating

that, unlike other gap genes, *Tc-mlpt* requires *Tc-otd-1* for its activation. However, given that the anterior *Tc-mlpt* domain has no obvious function in segmentation (Savard et al., 2006), it does not appear that the loss of *Tc-mlpt* activity contributes to the *Tc-otd-1* RNAi phenotype.

**Gnathal and thoracic anlagen are represented in *Tc-otd-1* RNAi blastoderms**

To further elucidate the function of *Tc-otd-1* in patterning gnathal and thoracic segments, we visualized the emergence of segment primordia by analyzing the *Tc-even-skipped* expression pattern (Fig. 2). In wild-type embryos, *Tc-eve* is initially expressed in a

double-segmental pattern, each stripe later resolving into secondary segmental stripes (Patel et al., 1994; Schoppmeier and Schroder, 2005). The first two primary *Tc-eve* stripes (*Tc-eve* stripe 1 and stripe 2; Fig. 2A), mark the maxillary and the first thoracic (T1) segment primordia, whereas the third primary stripe (*Tc-eve* stripe 3) covers the region where the growth zone will develop (Fig. 2C). In *Tc-otd-1* RNAi embryos, these primary *Tc-eve* stripes were formed, but the position of the first and second primary stripes was shifted towards the anterior (Fig. 2B). In addition, stripe 2 arose much broader than in wild type and only later refined to nearly normal width (Fig. 2D). Thus, like in wild type, all three primary *Tc-eve* domains develop during blastodermal stages, and their position and width reflects an expanded fate map congruous to the shifted positions of gap gene domains as described above.

We then asked whether other primary pair-rule gene patterns are similarly shifted. To this end, we double-stained wild-type and *Tc-otd-1*-depleted embryos for *Tc-eve* and *Tc-runt* and *Tc-eve* and *Tc-odd*, respectively (Fig. 3). In wild type, the primary *Tc-eve* stripe 1 partially overlaps with the first primary *runt* stripe (Fig. 3A), whereas *Tc-odd* stripe 1 was expressed complementary to *Tc-eve* stripes 1 and 2 (Fig. 3B) (Choe et al., 2006). Also in *Tc-otd-1* knockdown embryos, the expression domains of *Tc-odd* and *Tc-run*

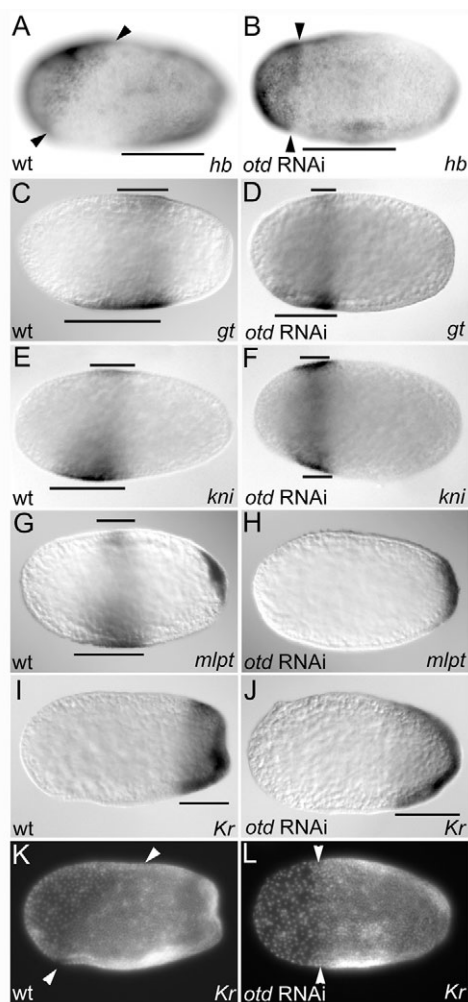

**Fig. 1. Expression of gap genes in *Tc-otd-1* RNAi.** (A-L) Differentiated blastoderm wild-type (A, C, E, G, I, K) and *Tc-otd-1* RNAi (B, D, F, H, J, L) embryos, stained for *hunchback* (*hb*; A, B), *giant* (*gt*; C, D), *knirps* (*kni*; E, F), *milles-pattes* (*mlpt*; G, H) or *Krüppel* (*Kr*; I-L) mRNA. Embryos in I, J were counterstained with Hoechst 33342 (K, L). (A, B) In *Tc-otd-1* RNAi, the embryonic *hb* domain is shifted towards the anterior (bars) and the posterior border of the serosal *hb* domain is not longer oblique (arrowheads). (C, D) Also, the anterior *Tc-gt* domain shifts toward the anterior (bars). (E, F) In *Tc-otd-1* RNAi, the pregnathal part of the *kni* domain is lost, whereas the gnathal part of the domain is shifted towards the anterior (bars). (G, H) The anterior *mlpt* domain is lost in *Tc-otd-1* RNAi. (I-L) The shift of gap-gene domain might expand to the *Tc-Kr* domain (J, bars). Arrowheads indicate the posterior boundary of the serosa. All figures are anterior to the left, lateral views.

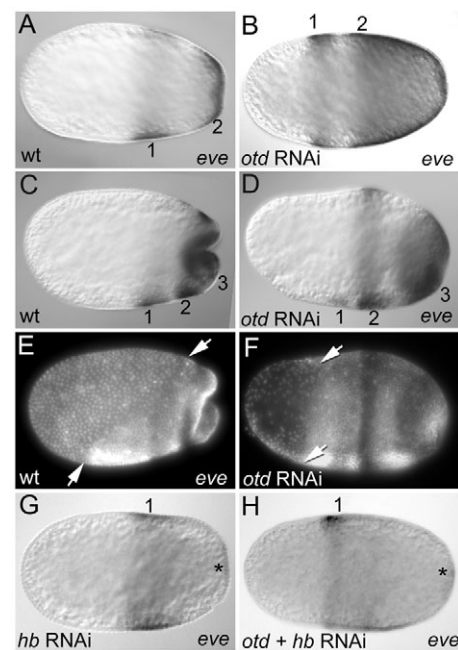

**Fig. 2. Gnathal segment anlagen are initially patterned in *Tc-otd-1* and *Tc-otd-1 Tc-hb* double RNAi.** (A-H) Expression of *even-skipped* in wild-type (A, B, E), *Tc-otd-1* RNAi (B, D, F), *Tc-hb* (G) and (H) *Tc-otd-1 Tc-hb* double RNAi. Some embryos were counterstained by Hoechst 33342 (panels E, F depict the same embryos as C, D). Embryos in A, B, G, H are in the undifferentiated blastoderm stage and embryos in C, D are in the differentiated blastoderm stage. (A-F) In *Tc-otd-1* RNAi, the primary *Tc-eve* stripes are still present, but shifted towards the anterior (compare A with B, stripe 1 and stripe 2). In addition, *Tc-eve* stripe 2 is enlarged. With the formation of *Tc-eve* stripe 3, the primary *eve* stripe 2 domain gets reduced to almost normal width (compare C with D). (G, H) In *Tc-hb* RNAi (G), the first primary *Tc-eve* domain is essentially unchanged, whereas in *Tc-otd-1* and *Tc-hb* double RNAi (H), a *Tc-otd-1* RNAi-like shift of the first primary *Tc-eve* domain is visible. Asterisks indicate the emerging *Tc-eve* stripe 2 domain. Arrows indicate the posterior boundary of the serosa.

were shifted towards the anterior. Importantly, the stripes of all three pair-rule genes appeared to be shifted in a coordinated manner and phasing among pair-rule patterns was preserved (Fig. 3C,D). These results clearly demonstrate that knockdown of *Tc-otd-1* does not affect the blastoderm fate map in a manner that could explain the loss of gnathum and thorax in RNAi larvae.

We further tested whether the combined knockdown of *Tc-otd-1* and *Tc-hb* has a more severe impact on the early fate map (Schroder, 2003). In *Tc-hb* RNAi blastoderms, pair-rule gene expression was delayed to some degree, as the third, and occasionally the second, primary stripes did not form until the early germ rudiment (Marques-Souza et al., 2008). Nevertheless, the gnathal segment anlagen are formed in *Tc-hb* RNAi embryos (Marques-Souza et al., 2008). Although we found *Tc-hb* RNAi not to shift the blastodermal fate map (Fig. 2G), in double-knockdown embryos a similar shift of the early *Tc-eve* domain was evident as in the *Tc-otd-1* RNAi situation (Fig. 2H). Thus, the *Tc-otd-1* RNAi-mediated AP fate map shift is not enhanced by simultaneous knock-down of *Tc-hb*.

### *Tc-otd-1* is required for serosa formation

Depletion of *Tc-otd-1* affects the morphological integrity of the serosa during differentiated blastoderm stages (Schroder, 2003). To analyze early patterning of the serosa anlage, we stained *Tc-otd-1* RNAi embryos for *zerknüllt-1* (*Tc-zen-1*), which in wild type is already expressed in the presumptive serosa before these cells become morphologically distinct from embryonic tissue (Fig. 4A) (Falciani et al., 1996; van der Zee et al., 2005). Knockdown of *Tc-otd-1* restricted early *Tc-zen-1* expression to a small region near the anterior pole of the egg, indicating that the anlage of the serosa was severely reduced but not completely absent (Fig. 4A,B). Thus, *Tc-otd-1* appears to contribute to the early serosal size regulation.

Strikingly, although in wild type the serosa-embryo boundary in the differentiated blastoderm is oblique, the smaller *Tc-zen-1* domain in *Tc-otd-1* RNAi embryos was rotationally symmetric with respect to the egg axis (Fig. 4B). Rotational symmetry of the *Tc-zen-1* domain is indicative of defective DV patterning (Nunes da Fonseca et al., 2008; van der Zee et al., 2006). Thus, the loss of *Tc-zen-1* expression asymmetry and the symmetric serosa-embryo

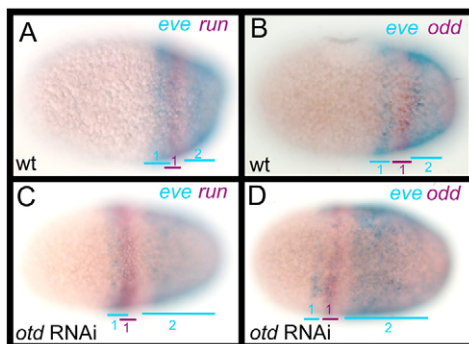

**Fig. 3. Pair-rule gene expression in *Tc-otd-1* RNAi.** (A–D) Stage-matched wild-type (A,B) and *Tc-otd-1* RNAi embryos (C,D) double-stained for *even-skipped* and *runt* (A,C) or *even-skipped* and *odd-skipped* (B,D). (A,C) In *Tc-otd-1* RNAi, the anterior *Tc-eve* stripe 1 and *Tc-runt* stripe 1 domains shift towards the anterior. Both are still expressed in the same register, indicating that their interactions are largely unchanged. (B,D) Apart from slight variations, *Tc-odd* and *Tc-eve* are still expressed in complementary anterior domains upon *Tc-otd-1* RNAi.

boundary in *Tc-otd-1* RNAi embryos (e.g. Fig. 1A,B,K,L; Fig. 2E,F; Fig. 4A,B,E,F) suggested that *Tc-otd-1* might not only be involved in early serosa size regulation, but also influence DV axis formation.

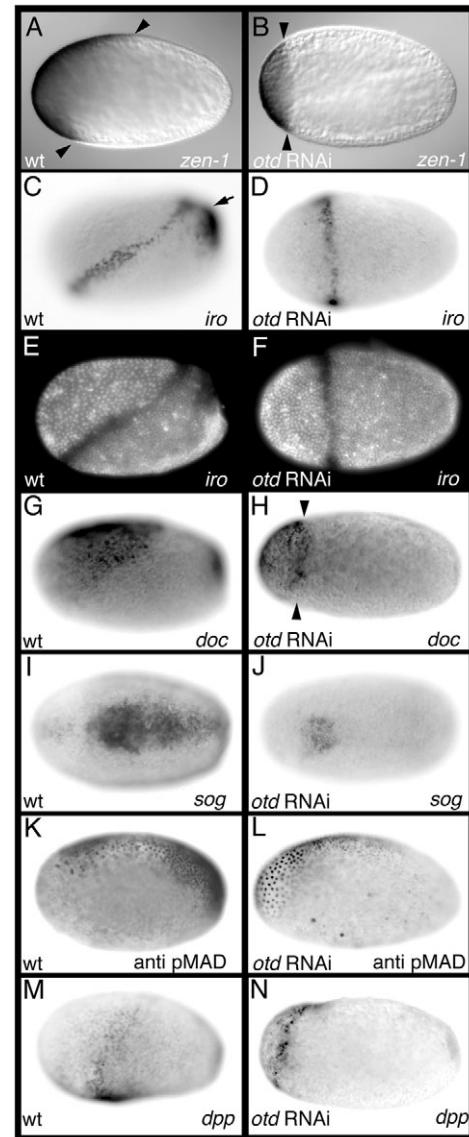

**Fig. 4. *Tc-otd-1* RNAi affects dorsoventral patterning.** (A–N) Stage-matched wild-type (A, C, E, G, I, K, M) and *Tc-otd-1* RNAi embryos (B, D, F, H, J, L, N). Embryos in C, D were counterstained by Hoechst 33342 to visualize the morphology (E, F). (A, B) The serosal *Tc-zen-1* domain is symmetric and reduced in *Tc-otd-1* RNAi (arrowheads). (C–F) As indicated by the *Tc-iro* staining, the serosa-embryo boundary has lost its obliqueness in *Tc-otd-1*. Moreover, the dorsal amnion (arrow in C) is not specified in *Tc-otd-1* RNAi. (G, H) Whereas in the wild-type *Tc-doc* is restricted to the dorsal serosa, it becomes ubiquitously expressed in *Tc-otd-1* RNAi (arrowheads in H point to the posterior border of the serosa). (I, J) The ventral *Tc-sog* domain is severely reduced in *Tc-otd-1* RNAi. (K, L) Embryos were stained with an antibody recognizing phosphorylated MAD (pMAD). In *Tc-otd-1* RNAi, pMAD becomes ubiquitously expressed in the serosa. (M, N) In *Tc-otd-1* RNAi, *Tc-dpp* becomes symmetrically expressed. All panels are lateral views except for I, J, which are ventral views.

### ***Tc-otd-1* controls Dpp activity via the regulation of *sog* expression**

It has been shown previously that the obliqueness of the serosa-germ rudiment border in *Tribolium* depends on BMP signaling. In the beetle blastoderm, Short gastrulation (*Sog*) is required to direct Dpp activity towards the dorsal side of the embryo (van der Zee et al., 2006). Interestingly, BMP signaling in *Tribolium* also is required for head formation as the head is a ventral anlage (van der Zee et al., 2006). Consequently, ventralization of the embryo through *Tc-dpp* RNAi results in an enlarged head region at the expense of the serosa. In such embryos, the serosa-germ rudiment border is rotationally symmetric and located at a more anterior position (van der Zee et al., 2006). *Tc-sog* RNAi, conversely, has the opposite effect, i.e. dorsalization of the embryo, along with serosa expansion at the expense of the head region. Also in this case, the serosa-embryo boundary develops perpendicular to the egg axis, but at a more posterior position than in wild type (van der Zee et al., 2006). Thus, there are obvious similarities between *Tc-otd-1* and *Tc-sog* RNAi phenotypes, as in both phenotypes the serosa-germ rudiment boundary is rotation-symmetric and the anterior head is deleted.

To elucidate the impact of *Tc-Otd-1* on DV axis formation, we monitored the expression of *dorsocross* (*Tc-doc*), which is asymmetrically distributed along the DV axis (Nunes da Fonseca et al., 2008; Tomoyasu et al., 2005; van der Zee et al., 2006). In wild type, *Tc-doc* is expressed in the dorsal 30% of the serosa (Fig. 4G). *Tc-otd-1* knockdown resulted in *Tc-doc* expression expanding into a broad DV-symmetric domain covering most of the residual serosa anlage (Fig. 4H). This resembles the situation in *Tc-sog* RNAi embryos (Nunes da Fonseca et al., 2008; van der Zee et al., 2006). Thus, in both *Tc-otd-1* and *Tc-sog* RNAi embryos, anterior tissue becomes dorsalized, as if the depletion of *Tc-otd-1* would prevent the diffusion-driven ventral-to-dorsal transport of Dpp by *Sog*. To investigate this further, we analyzed the expression of *Tc-sog* and *Tc-dpp* in *Tc-otd-1* RNAi embryos and monitored the activity of the Dpp signaling cascade by antibody staining against phosphorylated MAD (Mothers against Dpp; Fig. 4).

In wild type, *Tc-sog* is initially expressed in a broad ventral domain, which subsequently becomes more narrow and retracts from the serosa anlage (van der Zee et al., 2006). *Tc-dpp* mRNA is initially expressed near the anterior pole of the blastoderm embryo and later becomes localized in a stripe along the serosa-embryo boundary (Fig. 3M) (van der Zee et al., 2006). It has been shown that this anterior pattern of *Tc-dpp* expression is converted into a DV activity gradient (as monitored by pMAD staining) by *Sog*-mediated ventral-to-dorsal transport of Dpp (Fig. 4K) (van der Zee et al., 2006). We found that the ventral expression of *Tc-sog* was almost completely lost upon *Tc-otd-1* RNAi, as only a few cells near the serosa-embryo boundary still expressed *Tc-sog* mRNA (Fig. 4J). Consistent with *Tc-sog* downregulation, pMAD activity was no longer restricted to the dorsal side of the serosa in *Tc-otd-1* RNAi embryos but became ubiquitously distributed in this tissue (Fig. 4L), which is in accordance with the changes in expression of the Dpp target gene *Tc-doc* (Fig. 4H). Dpp activity in embryonic tissue, however, was largely absent (Fig. 4L), again resembling the situation after *Tc-sog* RNAi (van der Zee et al., 2006). These results indicate that *Tc-Otd-1* positively regulates *Tc-sog* expression, and thus is required for establishing DV polarity.

Consistent with reduced *Sog* activity, not only ventral tissue, but also dorsal structures, are lost upon *Tc-otd-1* RNAi. In the wild type, the *iroquois* gene (*Tc-iro*) (Nunes da Fonseca et al., 2008;

Tomoyasu et al., 2005; van der Zee et al., 2006) is expressed in a narrow stripe marking the anterior border of the germ rudiment, which will give rise to the anterior amnion (Fig. 4C,E). In addition, *Tc-iro* is expressed in the dorsal amnion (Nunes de Foseca et al., 2008). In *Tc-otd-1* RNAi embryos, the anterior stripe of *Tc-iro* expression was maintained, but became rotation-symmetric, indicating that the anterior amnion anlagen was present while the dorsal amnion was lost, as no dorsal or posterior *Tc-iro* expression could be detected (Fig. 4D,F). Thus, as in *Tc-sog* RNAi embryos (van der Zee et al., 2006), anterior tissue is dorsalized after *Tc-otd-1* RNAi, whereas more-posterior tissues lack peak levels of Dpp activity and become lateralized.

In conclusion, *Tc-otd-1* is essential for the appropriate distribution of Dpp activity. In *Tc-otd-1* RNAi embryos, *Sog* levels are severely reduced and Dpp activity does not become restricted to the dorsal side. As a consequence, the serosa-germ rudiment border remains straight and anterior embryonic tissue becomes dorsalized, which causes the loss of the anterior head.

### **Can the combined knockdown of *sog* and *zen-1* phenocopy the effect of *Tc-otd-1* RNAi?**

Our discovery that *Tc-otd-1* is involved in DV patterning raises the question of to which degree this function by itself can explain the loss of head structures in *Tc-otd-1* RNAi larvae. To investigate if partial inactivation of *Tc-sog* results in head phenotypes similar to *Tc-otd-1* RNAi larvae, we injected double-stranded *Tc-sog* RNA at low concentrations (200 ng/μl) into female pupae and analyzed their offspring for larval cuticle phenotypes (see Fig. S3, Table S2 in the supplementary material). In the first week of egg collection, most *Tc-sog* RNAi larvae displayed strong cuticle aberrations, including the 'double dorsal' phenotype described by van der Zee et al. (van der Zee et al., 2006) (see Fig. S3B-D in the supplementary material). As the RNAi effect subsided, normal cuticle morphology is restored in a posterior-to-anterior direction, ultimately resulting in larvae exhibiting normal DV polarity but lacking segments of the anterior head, resembling the situation after *Tc-otd-1* RNAi (see Fig. S3F in the supplementary material). Thus, in weak *Tc-sog*, as in *Tc-otd-1* RNAi, phenotypes, the anterior head (see Fig. S3F in the supplementary material) is deleted, indicating that the head defects in *Tc-otd-1* RNAi might well be due to dorsoventral misspecification of anterior ventral tissue (Fig. 7A,B).

*Tc-otd-1* RNAi alters DV positional information through regulation of *sog*, even though *Tc-Otd-1* itself is rotation-symmetrically expressed. Evidently, the spatially specific expression of *Tc-sog* must be regulated by another factor, i.e. Dorsal (Nunes da Fonseca et al., 2008). This raises the question of whether the observed shift of gap and pair-rule gene domains reflects positional information provided by *Tribolium* *Otd* or if this blastoderm fate map shift might also be an indirect effect. It has been shown previously that inactivation of *Tc-zen-1* results in an expansion of anterior germ rudiment structures (van der Zee et al., 2005) and that *Tc-zen-1* expression is reduced in *Tc-otd-1* RNAi embryos (Fig. 4B). We wondered whether the combined knockdown of the *Tc-Otd-1* target genes *Tc-zen-1* and *Tc-sog* can phenocopy the *Tc-otd-1* RNAi fate map shift along the AP axis. Indeed, we find that the double-knockdown of *Tc-zen-1* and *Tc-sog* results in a coordinated shift of *knirps*, *mlpt* and *even-skipped* expression domains towards the anterior, a shift not observed in embryos depleted for *Tc-sog* alone (Fig. 5; see also Fig. S2 in the supplementary material). Interestingly, whereas *Tc-otd-1* RNAi also results in the loss of the gnathal *Tc-mlpt* domain (Fig. 1H), in *Tc-*

*sog* *Tc-zen-1* double-RNAi this *Tc-mlpt* domain is still present (Fig. 5C,D), suggesting that, in addition to *Tc-sog* and *Tc-zen-1*, *Tc-Otd-1* activates at least one additional gene.

The combined knockdown of *Tc-zen-1* and *Tc-sog* results in a phenotype that comprises most aspects of the *Tc-otd-1* RNAi phenotype. As regulation of *Tc-zen-1* is unlikely to depend on the *Tc-Otd-1* gradient, it seems possible that *Tc-Otd-1* does not provide concentration-dependent positional information at the blastoderm stage.

### ***Tc-otd-1* knockdown causes early embryonic lethality**

In addition to the phenotypes described above, strongly affected *Tc-otd-1* RNAi embryos suffer from additional severe defects. Only about 30% of eggs collected in the first week after eclosion of injected animals were capable of secreting a larval cuticle, whereas 70% of the embryos die prior to completion of embryonic development (see Fig. S1, Table S1 in the supplementary material). This phenotype differs from that of other DV or AP patterning genes. Suspecting a more general basis of these severe phenotypes, we examined programmed cell death (apoptosis) in *Tc-otd-1* RNAi embryos by TUNEL staining (Fig. 6). Indeed, we found that upon *Tc-otd-1* RNAi, most embryonic and extra-embryonic cells already undergo apoptosis within the differentiated blastoderm stage (Fig. 6C,D), whereas in corresponding wild-type blastoderms, no sign of programmed cell death were recognized (Fig. 6A,B). This apoptosis phenotype is not observed in *Tc-sog* RNAi embryos and is most

prominent in the first week after injection (see Fig. S1 and Table S1 in the supplementary material), which might be why previous studies (Schinko et al., 2008; Schroder, 2003) missed this effect.

The anterior head clearly is the most sensitive structure, affected in nearly all *Tc-otd-1* RNAi larvae (see Fig. S1, Table S1 in the supplementary material), and this defect is also observed when *Tc-otd-1* dsRNA is injected at advanced embryonic stages such that only late *otd* expression is affected (Schinko et al., 2008). More rarely, segmentation defects are also observed in the thorax and abdomen (Schinko et al., 2008; Schroder, 2003). Interestingly, these more-posterior defects do not seem to fall into a clear AP progression, i.e. anterior thoracic defects are not more frequent than posterior thoracic defects, and these are not more frequent than abdominal defects (see Table S1 in the supplementary material). Thus, these trunk phenotypes cannot easily be ordered into a phenotypic series reflecting the AP *Otd* gradient. These randomly positioned defects can be explained, however, by randomly located apoptotic patches emerging in embryos where the degree of *Tc-otd-1* inactivation approaches the threshold required for cell survival. This model implies that, in addition to *Tc-sog* and several segmentation genes, *Otd* has additional as yet unidentified target genes, which we admit remain to be identified (candidates include any early expressed housekeeping gene).

### **DISCUSSION**

In this paper, we demonstrate two previously overlooked functions of *Tc-otd-1*, which are effected outside of the AP patterning paradigm but dominate the apparent segmentation phenotype of this gene in *Tribolium*. In consequence, we argue that the *Tc-otd-1* segmentation function itself is more limited than previously thought, and that it shares few similarities with the role that Bicoid plays during *Drosophila* segmentation.

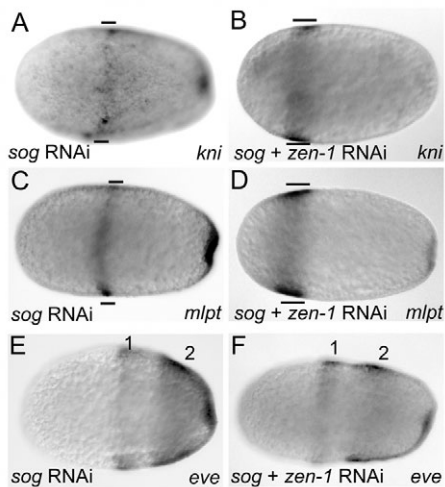

**Fig. 5. *Tc-zen-1* and *Tc-sog* double RNAi results in a *Tc-otd-1*-like fate map shift.** (A-F) Stage-matched *Tc-sog* RNAi-differentiated blastoderms (A,C,E) and *Tc-Sog* *Tc-zen-1* double RNAi embryos (B,D,F) stained for *Tc-kni* (A,B), *Tc-mlpt* (C,D) or *Tc-eve* (E,F). Wild-type expression is described in Fig. 1 (*Tc-kni*, *Tc-sog*) or Fig. 2 (*Tc-eve*), respectively. (A) In *Tc-sog* RNAi, the anterior *kni* domain is reduced but not shifted (bars). (B) In the *Tc-sog* and *Tc-zen-1* double knockdown, an anterior shift of the *kni* domain is obvious, thus resembling the *Tc-otd-1* RNAi phenotype (see Fig. 1). (C,D) In *Tc-sog* RNAi, the anterior *mlpt* domain is still present. In *Tc-sog* *Tc-zen-1* double RNAi, this domain is shifted in the anterior direction (bars). (E) In *Tc-sog* RNAi, two primary *Tc-eve* domains are present. (F) Embryos depleted of *Tc-sog* and *Tc-zen-1* resemble the *Tc-otd-1* knockdown situation. To ensure that *Tc-sog* RNAi indeed did not result in *Tc-otd-1*-like fate map shifts, only 'strong *Tc-sog* phenotypes', which were obtained in the first week of egg collection, were analyzed. (see Fig. S3, Table S2 in the supplementary material).

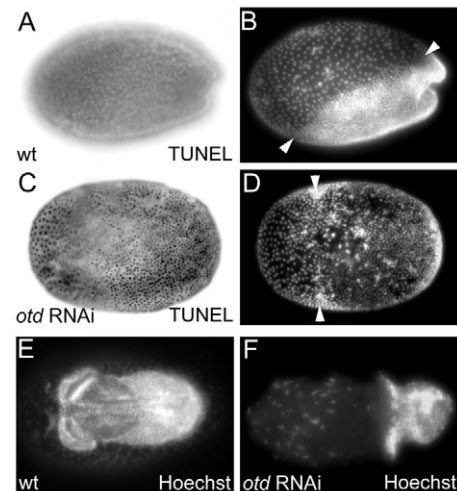

**Fig. 6. *Tc-otd-1* RNAi causes early cell lethality.** (A-F) Differentiated blastoderm wild-type (A) and *Tc-otd-1* RNAi (C) embryos stained for TUNEL to visualize apoptosis. Embryos were counterstained by Hoechst 33342 (B,D). Stage-matched wild-type (E) and *Tc-otd-1* RNAi (F) germling embryos stained for Hoechst 33342 to visualize the morphology. (A,B) In the wild type, no signs of apoptosis are obvious. (C,D) In *Tc-otd-1* RNAi, most extra-embryonic and embryonic cells undergo apoptosis. (E,F) During subsequent stages of development, the morphology of *Tc-otd-1* embryos is severely disrupted. Arrowheads in B and D point to the posterior boundary of the serosa. E, dorsal view; F, no obvious dorsoventral asymmetry.

### The role of *Tc-otd-1* in determining the AP fate map is less extensive than previously thought

There is no *bicoid* ortholog in *Tribolium* (Brown et al., 2001; Richards et al., 2008) and it has been proposed that *Tc-otd-1* might play a similar role in directing patterning along the AP axis as Bcd does in *Drosophila* (Schroder, 2003). This conjecture was supported by a phenotypic series of *Tc-otd-1* RNAi larvae – anterior deletions extending into gnathum and thorax – similar to that of *bicoid* mutants. Moreover, simultaneous knockdown of *Tc-otd-1* and *Tc-hb* appeared to synergistically enhance the phenotype, reminiscent of synergistic activation of target genes by Bcd and Hb in *Drosophila* (Simpson-Brose et al., 1994). Given that in *Drosophila* the transcription factors Otd and Bcd have similar target specificities (Finkelstein and Perrimon, 1990; Tahayato et al., 2003; Wimmer et al., 2000), this proposition appeared to support a simple evolutionary model according to which, in higher dipterans, Bcd took over anterior regulatory functions previously fulfilled by the widely conserved *otd* gene. We reanalyzed the *Tribolium otd-1* phenotype using additional molecular markers and come to very different conclusions (Fig. 7).

In order to see whether the fate map of *Tribolium* blastoderm embryos reflects the patterning defects observed in larval cuticles, we investigated the expression of early active marker genes. We find that gnathal and thoracic expression domains of gap gene orthologs – *Tc-hb*, *Tc-kni*, *Tc-gt* and *Tc-btd* – are not obliterated as they are in *bicoid* mutants (Driever and Nusslein-Volhard, 1988; Hulskamp et al., 1990; Kraut and Levine, 1991; Rivera-Pomar et

al., 1995; Tautz, 1988). These domains are shifted anteriorly in a coordinated fashion (Fig. 1; see Fig. S2 in the supplementary material), which in principle is consistent with a long-range morphogen function of Tc-Otd-1. However, the observed fate map shift in *Tc-otd-1* knockdown embryos is small and can only explain the pregnathal defects observed in the terminal phenotype, not the segmental deletions in gnathal and thoracic regions. This surprisingly small effect of *Tc-otd-1* inactivation on AP patterning is confirmed at the level of pair-rule genes, where we find that the first three stripes of the primary pair-rule genes *Tc-runt*, *Tc-eve* and *Tc-odd* are formed normally, albeit shifted anteriorly (Figs 2, 3). The pregnathal region – the interval between the first pair-rule gene stripe and the serosa-embryo boundary – is reduced in size in *Tc-otd-1* RNAi blastoderms, consistent with the loss of pregnathal structures observed in the terminal phenotype. These pregnathal defects (see Fig. S2 in the supplementary material for *Tc-ems* expression) might be explained by the mild AP fate map shift we observed, but also the dorsoventral changes we find in *Tc-otd-1* RNAi embryos must result in loss of the pregnathal head (see below).

It is a strange coincidence, however, that these pregnathal defects can also be explained by the dorsoventral changes we find in these RNAi embryos (see below). Moreover, it has been shown that inactivation of *Tc-otd-1* at post-blastodermal stages also results in the loss of labrum and antennae (Schinko et al., 2008). Therefore, it is remarkable that all three obvious patterning effects of *Tc-otd-1* can only explain loss of the most-anterior head structures, not the segmental deletions in gnathal and thoracic regions in the terminal phenotype.

It had been previously proposed that Tc-Otd-1 and Tc-Hb cooperatively function as anterior morphogens in *Tribolium* (Schroder, 2003). However, the fate map shift in *Tc-otd-1* RNAi blastoderms is not enhanced by the simultaneous knockdown of *Tc-hb* (Fig. 2G,H). Thus, there is no obvious synergistic effect of *Tc-otd-1* and *Tc-hb* on blastodermal patterning. Marques-Souza and colleagues (Marques-Souza et al., 2008) already showed (and our unpublished results confirm this) that knockdown of *Tc-hb* results not in the loss of gnathal and thoracic segments but in their transformation to abdominal fates. Abdominal segments are deleted, however, in strong *Tc-hb* RNAi embryos. Thus, the severe double-RNAi defects (Schroder, 2003) should be interpreted as a superposition of anterior deletions (*Tc-otd-1*) and posterior deletions (*Tc-hb*) rather than synergistic morphogen action.

Given that the gnathal and thoracic region are enlarged rather than reduced in *Tc-otd-1* RNAi blastoderm embryos, their absence in many RNAi larvae appears to be due to secondary loss at post-blastodermal stages. Several mechanisms could account for this secondary loss. According to one scenario, certain *Tc-otd-1* target genes might be shifted or misexpressed to a larger degree than others, resulting in abnormal overlaps of expression activities, which might be incompatible with continued development of these primordia. However, we found that a number of segmentation gene domains shift in a coordinated fashion (Figs 1-3; see also Figs S2 and S5 in the supplementary material). Nevertheless, we cannot exclude that some other gene(s) might fail to obey that pattern. Our finding that the anterior domain of *mlpt* is affected differently than those of *Tc-kni* and *Tc-gt* (Fig. 1) could be seen as support for such a mechanism, even though this domain does not appear to be involved in segmentation (Savard et al., 2006). However, the pleiotropic nature of the *Tc-otd-1* phenotype suggests a different explanation for the secondary loss of gnathal and thoracic primordia in these embryos (see below).

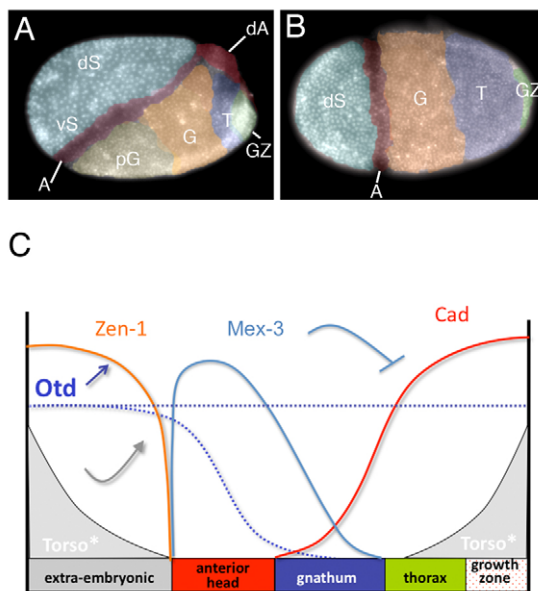

**Fig. 7. Schematic representation of *Tc-otd-1* RNAi phenotypes.**

(A,B) Schematic fate map of a *Tribolium* wild-type-differentiated blastoderm (A) and of a *Tc-otd-1* RNAi-differentiated blastoderm (B) embryo. (A) In wild type, serosa can be subdivided into a dorsal (dS) and a ventral (vS) part. The amnion (A) runs from a dorsal anterior to a posterior ventral direction. The anterior head (pG) is a ventral anlagen. dA, dorsal amnion; G, gnathal segments; GZ, growth zone; T, thoracic segments. (B) Upon *Tc-otd-1* RNAi, the residual serosa is dorsalized (dS) and the amnion (A) is not longer oblique. Gnathal (G) and thoracic (T) segment primordia are initially patterned. (C) Schematic representation of early anteroposterior axis formation and blastodermal patterning. Early homogeneous expression might account for all blastoderm functions of *Tc-otd-1* (see text for details).

### ***Tc-otd-1* is essential for *sog* activation and dorsoventral patterning**

*Tribolium* wild-type embryos exhibit, at the differentiated blastoderm stage, a distinct dorsoventral polarity in that the serosa expands dorsally, displacing the embryonic tissue towards the ventral and posterior (Falciani et al., 1996; van der Zee et al., 2005). By contrast, *Tc-otd-1* RNAi embryos retain rotation symmetry at this stage and during subsequent gastrulation movements (Fig. 4). This phenotype is reminiscent of that caused by knockdown of dorsoventral genes (Nunes da Fonseca et al., 2008; van der Zee et al., 2006). Indeed, we find that mRNA expression of the pivotal ventral factor *Tc-sog* is severely reduced in these embryos. Similar to *Tc-sog* RNAi embryos, *Tc-otd-1* blastoderms are dorsalized at an anterior-ventral level and lateralized at a posterior-dorsal level, as demonstrated by circumferential expression of a dorsal serosa marker (*doc*), loss of dorsal amnion (*pnr*) and a reduced dorsal activity of the zygotic dorsal morphogen Tc-Dpp (pMAD; Fig. 4).

The anterior head is a ventral primordium in *Tribolium* (van der Zee et al., 2006) and dorsalized embryos lack anterior head structures. This is also the case in *Tc-sog* RNAi larvae (see Fig. S3 in the supplementary material) (van der Zee et al., 2006), and the severe reduction of *Tc-sog* expression in principle could fully account for the loss of anterior head primordia in *Tc-otd-1* RNAi embryos (Fig. 7). As *Tc-sog* expression also requires activation by Dorsal (Nunes da Fonseca et al., 2008), our results indicate that DV axis patterning (and anterior head formation) in *Tribolium* depends on the combinatorial input of signals from DV (Tc-Dorsal) and AP (Tc-Otd-1) patterning systems. Also in *Drosophila*, the formation of AP and DV axes is not entirely independent, as certain aspects of AP gene expression respond to DV positional information (Carroll et al., 1987; Gao and Finkelstein, 1998; Liaw and Lengyel, 1993; Rothe et al., 1994; Zeitlinger et al., 2007). However, segmentation gene expression in *Drosophila* is only modulated somewhat by the DV system, whereas in *Tribolium* the input of the 'AP factor' Otd-1 is absolutely essential for DV patterning.

An important difference between the fate map changes in *Tc-sog* and *Tc-otd-1* RNAi embryos, however, concerns the size of the serosa. Consistent with the oblique boundary of the serosa anlagen in wild type, in dorsalized embryos the serosa expands at the expense of the (ventrally located) anterior head. In *Tc-otd-1* RNAi embryos, however, the serosa primordium is dramatically reduced in size, albeit rotation-symmetric as in dorsalized blastoderms (e.g. Fig. 3). *Tc-zen-1* is required for serosa formation in *Tribolium* (van der Zee et al., 2005) and the expression of this gene is reduced in *Tc-otd-1* but not in *Tc-sog* RNAi. *Tc-zen-1*, therefore, is a probable third direct target activated by Tc-Otd-1, in addition to *Tc-sog* and *Tc-mlpt* (Figs 1, 7).

### **Early homogeneous expression might account for all blastoderm functions of *Tc-otd-1***

The spatial localization of the *Tc-sog* domain is clearly provided through its activation by Tc-Dorsal (Nunes de Foseca et al., 2008). Given that Tc-Otd-1 appears only to 'boost' a promoter activity whose spatial specificity is provided by another input, and given the early onset of *Tc-sog* expression, it is probably the initial homogeneous expression of Tc-Otd-1 that is used by the *sog* promoter to amplify the activating signal provided by the DV system.

Similarly, we would argue that *Tc-zen-1* also receives spatially specific regulatory information from another source, i.e. the terminal system, as in *Tc-tor* or *Tc-*tsl** RNAi embryos the *Tc-zen-1*

domain is much reduced in size (M.S., unpublished). Indeed, upon *Tc-otd-1* and *Tc-*tsl** double RNAi, *Tc-zen-1* expression is lost (see Fig. S4 in the supplementary material). Although *Tc-otd-1* clearly influences the size of the *Tc-zen-1* domain (Fig. 4), it is unlikely that the *Tc-zen-1* expression boundary is read from the Tc-Otd-1 gradient as, at this anterior position in the egg, Tc-Otd-1 expression levels are rather uniform throughout blastoderm development (Schroder, 2003). Instead, the terminal system appears to provide a short-range graded signal near the anterior pole, which is enhanced by Tc-Otd-1 (Schoppmeier and Schroder, 2005).

It might well be that the similarity between *Tc-sog* and *Tc-zen-1* in receiving a general boost rather than spatial information from Tc-Otd-1 also extends to the way they mediate the fate map changes resulting from Tc-Otd-1 inactivation. In the case of *Tc-sog*, it is clear that all DV defects of *Tc-otd-1* RNAi can be accounted for by its effect on *Tc-sog* expression. Our *Tc-sog* *Tc-zen-1* double-RNAi experiment shows that much of the AP fate map effect of *Tc-otd-1* inactivation might be mediated through Tc-Zen-1. In double-knockdown embryos, also fates outside the serosa region, e.g. the anterior *Tc-kni* domain and the first two *eve* stripes, are shifted anteriorly (Fig. 5). It is conceivable, therefore, that all or most of the AP fate map shift caused by *Tc-otd-1* knockdown can be explained by its activating effect on *Tc-zen-1* alone.

A general requirement, presumably provided by early uniform Tc-Otd-1 expression, is also revealed by the cell lethality phenotype of *Tc-otd-1* RNAi embryos (Fig. 6). In *Drosophila*, segmentation mutants show a dramatic increase in apoptotic death (Adachi-Yamada and O'Connor, 2002; DiNardo et al., 1994; Klingensmith et al., 1989; Magrassi and Lawrence, 1988; Namba et al., 1997; White and Lehmann, 1986). However, although apoptosis in such *Drosophila* mutants is locally restricted, the situation in strong *Tc-otd-1* RNAi embryos is different, as all extra-embryonic and embryonic cells undergo apoptosis (Fig. 6). Less severe apoptosis phenotypes, however, could explain the previously described stronger cuticle phenotypes (Schinko et al., 2008; Schroder, 2003), which we also observed (see Fig. S1, Table S1 in the supplementary material). In such embryos, apoptosis might be restricted to patches covering few segment primordia, which enables the residual (probably less affected) embryonic anlagen to escape lethality and to eventually secrete cuticle (see Fig. S1 and Table S1 in the supplementary material). Although we do not know the exact causes of early cell lethality in *Tc-otd-1* RNAi embryos, this apoptosis phenotype might well represent a third function of Tc-Otd-1, i.e. a function independent of its role in blastoderm patterning, which probably involves additional target genes, e.g. zygotically expressed early housekeeping genes that rely on homogeneously expressed Tc-Otd-1 for gene activation.

In conclusion, our data provide little reason to believe that the gradient of Tc-Otd-1 is more than a transitional stage between homogeneous blastoderm function and the subsequent head gap gene function (Schinko et al., 2008). In this respect, the Otd gradient in *Tribolium* might be more comparable to the *Drosophila* Caudal gradient, which only provides general activation rather than positional information (Cho et al., 2005; Hader et al., 1998; Macdonald and Struhl, 1986; Mlodzik et al., 1990; Niessing et al., 2002; Niessing et al., 1999; Rivera-Pomar et al., 1996).

### **Anterior patterning in short-germ insects**

AP pattern formation in the early *Drosophila* embryo is initiated by three maternally provided systems (St Johnston and Nusslein-Volhard, 1992). In the short-germ beetle *Tribolium*, the terminal system (i.e. Torso receptor tyrosine kinase signaling) plays a



prominent role in early axis formation (Schoppmeier and Schroder, 2005). At the posterior, Torso-signaling is required for growth zone formation and, at the anterior, it is involved in serosa formation via activation of *Tc-zen-1* (Fig. 7). Patterning of gnathum and the thorax depends on a posterior-to-anterior Tc-Cad gradient (Copf et al., 2003). This gradient is formed through translational repression, mediated by combined activities of zygotically expressed Tc-Mex-3 and Tc-Zen-2 (Schoppmeier et al., 2009). However, the Tc-Cad gradient does not appear to provide concentration-dependent positional information (Schoppmeier et al., 2009). In *Tc-otd-1* RNAi, *Tc-Mex-3* expression resembles the effects of *Tc-otd-1* RNAi on the *Tribolium* gap genes (see Fig. S5 in the supplementary material), indicating that *Tc-Mex-3* also does not require Tc-Otd-1 for its activation.

As the posterior system (*nanos* and *pumilio*) also plays only a minor role in the *Tribolium* blastoderm (C. Schmitt and M.S., in preparation), we believe that additional maternal positional information systems must be present in this species. However, our data indicate that this function is not provided by the *Tc-otd-Tc-hb* system. Anterior patterning in long-germ insects involves localized determinants [e.g. *bcd* in *Drosophila* (Driever and Nusslein-Volhard, 1988) and *otd*, *cad* and *gi* in *Nasonia* (Brent et al., 2007; Lynch et al., 2006; Olesnicki et al., 2006)]. In *Tribolium*, only two localized mRNAs are known so far that have no patterning activity (Bucher et al., 2005). However, given that the localization machinery evidently is functioning during *Tribolium* oogenesis, we expect that additional maternally localized gradient systems remain to be identified in this species.

Finally, it should be noted that there is a stunning similarity between the fate map effects caused by the loss of *Drosophila bcd* and those caused by *zen-1* RNAi in *Tribolium* as, in both, anterior regions of the early embryo are deleted and replaced by the expansion of more-posterior regions (van der Zee et al., 2005). Even though the effect of Tc-Zen-1 as a long-reaching AP regulator is relatively minor compared with that of Bcd, the role of Tc-Zen-1 in early *Tribolium* embryogenesis clearly deserves more detailed study given that *bicoid* evolved from a *zen* precursor (Stauber et al., 1999).

#### Acknowledgements

We thank Christian Schmitt for helpful comments and discussions and Gregor Bucher for providing the *btd* and *ems* clones. The laboratories of M.S. and M.K. are funded through grants by the German Research Foundation (DFG).

#### Competing interests statement

The authors declare no competing financial interests.

#### Supplementary material

Supplementary material for this article is available at <http://dev.biologists.org/lookup/suppl/doi:10.1242/dev.047043/-DC1>

#### References

- Adachi-Yamada, T. and O'Connor, M. B. (2002). Morphogenetic apoptosis: a mechanism for correcting discontinuities in morphogen gradients. *Dev. Biol.* **251**, 74-90.
- Ashe, H. L. and Levine, M. (1999). Local inhibition and long-range enhancement of Dpp signal transduction by Sog. *Nature* **398**, 427-431.
- Biehs, B., Francois, V. and Bier, E. (1996). The *Drosophila* short gastrulation gene prevents Dpp from autoactivating and suppressing neurogenesis in the neuroectoderm. *Genes Dev.* **10**, 2922-2934.
- Blankenship, J. T. and Wieschaus, E. (2001). Two new roles for the *Drosophila* AP patterning system in early morphogenesis. *Development* **128**, 5129-5138.
- Brent, A. E., Yucel, G., Small, S. and Desplan, C. (2007). Permissive and instructive anterior patterning rely on mRNA localization in the wasp embryo. *Science* **315**, 1841-1843.
- Brown, S., Fellers, J., Shippy, T., Denell, R., Stauber, M. and Schmidt-Ott, U. (2001). A strategy for mapping bicoid on the phylogenetic tree. *Curr. Biol.* **11**, R43-R44.
- Bucher, G. and Klingler, M. (2004). Divergent segmentation mechanism in the short germ insect *Tribolium* revealed by giant expression and function. *Development* **131**, 1729-1740.
- Bucher, G., Scholten, J. and Klingler, M. (2002). Parental RNAi in *Tribolium* (Coleoptera). *Curr. Biol.* **12**, R85-R86.
- Bucher, G., Farzana, L., Brown, S. J. and Klingler, M. (2005). Anterior localization of maternal mRNAs in a short germ insect lacking bicoid. *Evol. Dev.* **7**, 142-149.
- Carroll, S. B., Winslow, G. M., Twombly, V. J. and Scott, M. P. (1987). Genes that control dorsoventral polarity affect gene expression along the anteroposterior axis of the *Drosophila* embryo. *Development* **99**, 327-332.
- Cerny, A. C., Bucher, G., Schroder, R. and Klingler, M. (2005). Breakdown of abdominal patterning in the *Tribolium* Kruppel mutant jaws. *Development* **132**, 5353-5363.
- Cerny, A. C., Grossmann, D., Bucher, G. and Klingler, M. (2008). The *Tribolium* ortholog of knirps and knirps-related is crucial for head segmentation but plays a minor role during abdominal patterning. *Dev. Biol.* **321**, 284-294.
- Cho, P. F., Poulin, F., Cho-Park, Y. A., Cho-Park, I. B., Chicoine, J. D., Lasko, P. and Sonenberg, N. (2005). A new paradigm for translational control: inhibition via 5'-3' mRNA tethering by Bicoid and the eIF4E cognate 4EHP. *Cell* **121**, 411-423.
- Choe, C. P., Miller, S. C. and Brown, S. J. (2006). A pair-rule gene circuit defines segments sequentially in the short-germ insect *Tribolium castaneum*. *Proc. Natl. Acad. Sci. USA* **103**, 6560-6564.
- Cohen, S. M. and Jurgens, G. (1990). Mediation of *Drosophila* head development by gap-like segmentation genes. *Nature* **346**, 482-485.
- Copf, T., Rabet, N., Celniker, S. E. and Averof, M. (2003). Posterior patterning genes and the identification of a unique body region in the brine shrimp *Artemia franciscana*. *Development* **130**, 5915-5927.
- DiNardo, S., Heemskerk, J., Dougan, S. and O'Farrell, P. H. (1994). The making of a maggot: patterning the *Drosophila* embryonic epidermis. *Curr. Opin. Genet. Dev.* **4**, 529-534.
- Driever, W. and Nusslein-Volhard, C. (1988). The bicoid protein determines position in the *Drosophila* embryo in a concentration-dependent manner. *Cell* **54**, 95-104.
- Falciani, F., Hausdorf, B., Schroder, R., Akam, M., Tautz, D., Denell, R. and Brown, S. (1996). Class 3 Hox genes in insects and the origin of zen. *Proc. Natl. Acad. Sci. USA* **93**, 8479-8484.
- Finkelstein, R. and Perrimon, N. (1990). The orthodenticle gene is regulated by bicoid and torso and specifies *Drosophila* head development. *Nature* **346**, 485-488.
- Finkelstein, R., Smouse, D., Capaci, T. M., Spradling, A. C. and Perrimon, N. (1990). The orthodenticle gene encodes a novel homeo domain protein involved in the development of the *Drosophila* nervous system and ocular visual structures. *Genes Dev.* **4**, 1516-1527.
- Gao, Q. and Finkelstein, R. (1998). Targeting gene expression to the head: the *Drosophila* orthodenticle gene is a direct target of the Bicoid morphogen. *Development* **125**, 4185-4193.
- Hader, T., La Rosee, A., Zibold, U., Busch, M., Taubert, H., Jackle, H. and Rivera-Pomar, R. (1998). Activation of posterior pair-rule stripe expression in response to maternal caudal and zygotic knirps activities. *Mech. Dev.* **71**, 177-186.
- Hulskamp, M., Pfeifle, C. and Tautz, D. (1990). A morphogenetic gradient of hunchback protein organizes the expression of the gap genes Kruppel and knirps in the early *Drosophila* embryo. *Nature* **346**, 577-580.
- Klingensmith, J., Noll, E. and Perrimon, N. (1989). The segment polarity phenotype of *Drosophila* involves differential tendencies toward transformation and cell death. *Dev. Biol.* **134**, 130-145.
- Klingler, M. (2004). *Tribolium*. *Curr. Biol.* **14**, R639-R640.
- Kraut, R. and Levine, M. (1991). Spatial regulation of the gap gene giant during *Drosophila* development. *Development* **111**, 601-609.
- Lall, S. and Patel, N. H. (2001). Conservation and divergence in molecular mechanisms of axis formation. *Annu. Rev. Genet.* **35**, 407-437.
- Liaw, G. J. and Lengyel, J. A. (1993). Control of tailless expression by bicoid, dorsal and synergistically interacting terminal system regulatory elements. *Mech. Dev.* **40**, 47-61.
- Lynch, J. A., Brent, A. E., Leaf, D. S., Pultz, M. A. and Desplan, C. (2006). Localized maternal orthodenticle patterns anterior and posterior in the long germ wasp *Nasonia*. *Nature* **439**, 728-732.
- Macdonald, P. M. and Struhl, G. (1986). A molecular gradient in early *Drosophila* embryos and its role in specifying the body pattern. *Nature* **324**, 537-545.
- Magrassi, L. and Lawrence, P. A. (1988). The pattern of cell death in fushi tarazu, a segmentation gene of *Drosophila*. *Development* **104**, 447-551.
- Marques, G., Musacchio, M., Shimell, M. J., Wunnenberg-Stapleton, K., Cho, K. W. and O'Connor, M. B. (1997). Production of a DPP activity gradient in the early *Drosophila* embryo through the opposing actions of the SOG and TLD proteins. *Cell* **91**, 417-426.
- Marques-Souza, H., Aranda, M. and Tautz, D. (2008). Delimiting the conserved features of hunchback function for the trunk organization of insects. *Development* **135**, 881-888.

- Mrdzik, M., Gibson, G. and Gehring, W. J.** (1990). Effects of ectopic expression of caudal during *Drosophila* development. *Development* **109**, 271-277.
- Moussian, B. and Roth, S.** (2005). Dorsal-ventral axis formation in the *Drosophila* embryo-shaping and transducing a morphogen gradient. *Curr. Biol.* **15**, R887-R899.
- Namba, R., Pazdera, T. M., Cerrone, R. L. and Minden, J. S.** (1997). *Drosophila* embryonic pattern repair: how embryos respond to bicoid dosage alteration. *Development* **124**, 1393-1403.
- Niessing, D., Dostatni, N., Jackle, H. and Rivera-Pomar, R.** (1999). Sequence interval within the PEST motif of Bicoid is important for translational repression of caudal mRNA in the anterior region of the *Drosophila* embryo. *EMBO J.* **18**, 1966-1973.
- Niessing, D., Blanke, S. and Jackle, H.** (2002). Bicoid associates with the 5'-cap-bound complex of caudal mRNA and represses translation. *Genes Dev.* **16**, 2576-2582.
- Nunes da Fonseca, R., von Levetzow, C., Kalscheuer, P., Basal, A., van der Zee, M. and Roth, S.** (2008). Self-regulatory circuits in dorsoventral axis formation of the short-germ beetle *Tribolium castaneum*. *Dev. Cell* **14**, 605-615.
- Olesnicki, E. C., Brent, A. E., Tonnes, L., Walker, M., Pultz, M. A., Leaf, D. and Desplan, C.** (2006). A caudal mRNA gradient controls posterior development in the wasp *Nasonia*. *Development* **133**, 3973-3982.
- Patel, N. H., Kornberg, T. B. and Goodman, C. S.** (1989). Expression of engrailed during segmentation in grasshopper and crayfish. *Development* **107**, 201-212.
- Patel, N. H., Condron, B. G. and Zinn, K.** (1994). Pair-rule expression patterns of even-skipped are found in both short- and long-germ beetles. *Nature* **367**, 429-434.
- Prpic, N. M. and Damen, W. G.** (2005). Cell death during germ band inversion, dorsal closure, and nervous system development in the spider *Cupiennius salei*. *Dev. Dyn.* **234**, 222-228.
- Prpic, N. M., Wigand, B., Damen, W. G. and Klingler, M.** (2001). Expression of dachshund in wild-type and Distal-less mutant *Tribolium* corroborates serial homologies in insect appendages. *Dev. Genes Evol.* **211**, 467-477.
- Pultz, M. A., Westendorf, L., Gale, S. D., Hawkins, K., Lynch, J., Pitt, J. N., Reeves, N. L., Yao, J. C., Small, S., Desplan, C. et al.** (2005). A major role for zygotic hunchback in patterning the *Nasonia* embryo. *Development* **132**, 3705-3715.
- Richards, S., Gibbs, R. A., Weinstock, G. M., Brown, S. J., Denell, R., Beeman, R. W., Gibbs, R., Bucher, G., Friedrich, M., Grimmelikhuijzen, C. J. et al.** (2008). The genome of the model beetle and pest *Tribolium castaneum*. *Nature* **452**, 949-955.
- Rivera-Pomar, R., Lu, X., Perrimon, N., Taubert, H. and Jackle, H.** (1995). Activation of posterior gap gene expression in the *Drosophila* blastoderm. *Nature* **376**, 253-256.
- Rivera-Pomar, R., Niessing, D., Schmidt-Ott, U., Gehring, W. J. and Jackle, H.** (1996). RNA binding and translational suppression by bicoid. *Nature* **379**, 746-749.
- Rothe, M., Wimmer, E. A., Pankratz, M. J., Gonzalez-Gaitan, M. and Jackle, H.** (1994). Identical transacting factor requirement for knirps and knirps-related gene expression in the anterior but not in the posterior region of the *Drosophila* embryo. *Mech. Dev.* **46**, 169-181.
- Savard, J., Marques-Souza, H., Aranda, M. and Tautz, D.** (2006). A segmentation gene in *tribolium* produces a polycistronic mRNA that codes for multiple conserved peptides. *Cell* **126**, 559-569.
- Schinko, J. B., Kreuzer, N., Offen, N., Posnien, N., Wimmer, E. A. and Bucher, G.** (2008). Divergent functions of orthodenticle, empty spiracles and buttonhead in early head patterning of the beetle *Tribolium castaneum* (Coleoptera). *Dev. Biol.* **317**, 600-613.
- Schoppmeier, M. and Schroder, R.** (2005). Maternal torso signaling controls body axis elongation in a short germ insect. *Curr. Biol.* **15**, 2131-2136.
- Schoppmeier, M., Fischer, S., Schmitt-Engel, C., Lohr, U. and Klingler, M.** (2009). An ancient anterior patterning system promotes caudal repression and head formation in Ecdysozoa. *Curr. Biol.* **19**, 1811-1815.
- Schroder, R.** (2003). The genes orthodenticle and hunchback substitute for bicoid in the beetle *Tribolium*. *Nature* **422**, 621-625.
- Simpson-Brose, M., Treisman, J. and Desplan, C.** (1994). Synergy between the hunchback and bicoid morphogens is required for anterior patterning in *Drosophila*. *Cell* **78**, 855-865.
- Small, S., Blair, A. and Levine, M.** (1992). Regulation of even-skipped stripe 2 in the *Drosophila* embryo. *EMBO J.* **11**, 4047-4057.
- Sommer, R. J. and Tautz, D.** (1993). Involvement of an orthologue of the *Drosophila* pair-rule gene hairy in segment formation of the short germ-band embryo of *Tribolium* (Coleoptera). *Nature* **361**, 448-450.
- St Johnston, D. and Nusslein-Volhard, C.** (1992). The origin of pattern and polarity in the *Drosophila* embryo. *Cell* **68**, 201-219.
- Stathopoulos, A. and Levine, M.** (2002). Dorsal gradient networks in the *Drosophila* embryo. *Dev. Biol.* **246**, 57-67.
- Stauber, M., Jackle, H. and Schmidt-Ott, U.** (1999). The anterior determinant bicoid of *Drosophila* is a derived Hox class 3 gene. *Proc. Natl. Acad. Sci. USA* **96**, 3786-3789.
- Stauber, M., Prell, A. and Schmidt-Ott, U.** (2002). A single Hox3 gene with composite bicoid and zerknullt expression characteristics in non-Cyclorrhaphan flies. *Proc. Natl. Acad. Sci. USA* **99**, 274-279.
- Tahayato, A., Sonnevile, R., Pichaud, F., Wernet, M. F., Papatsenko, D., Beaufils, P., Cook, T. and Desplan, C.** (2003). Otd/Crx, a dual regulator for the specification of ommatidia subtypes in the *Drosophila* retina. *Dev. Cell* **5**, 391-402.
- Tautz, D.** (1988). Regulation of the *Drosophila* segmentation gene hunchback by two maternal morphogenetic centres. *Nature* **332**, 281-284.
- Tautz, D. and Pfeifle, C.** (1989). A non-radioactive in situ hybridization method for the localization of specific RNAs in *Drosophila* embryos reveals translational control of the segmentation gene hunchback. *Chromosoma* **98**, 81-85.
- Tomoyasu, Y., Wheeler, S. R. and Denell, R. E.** (2005). Ultrabithorax is required for membranous wing identity in the beetle *Tribolium castaneum*. *Nature* **433**, 643-647.
- van der Zee, M., Berns, N. and Roth, S.** (2005). Distinct functions of the *Tribolium* zerknullt genes in serosa specification and dorsal closure. *Curr. Biol.* **15**, 624-636.
- van der Zee, M., Stockhammer, O., von Levetzow, C., Nunes da Fonseca, R. and Roth, S.** (2006). Sog/Chordin is required for ventral-to-dorsal Dpp/BMP transport and head formation in a short germ insect. *Proc. Natl. Acad. Sci. USA* **103**, 16307-16312.
- White, R. A. and Lehmann, R.** (1986). A gap gene, hunchback, regulates the spatial expression of Ultrabithorax. *Cell* **47**, 311-321.
- Wimmer, E. A., Carleton, A., Harjes, P., Turner, T. and Desplan, C.** (2000). Bicoid-independent formation of thoracic segments in *Drosophila*. *Science* **287**, 2476-2479.
- Wolff, C., Sommer, R., Schroder, R., Glaser, G. and Tautz, D.** (1995). Conserved and divergent expression aspects of the *Drosophila* segmentation gene hunchback in the short germ band embryo of the flour beetle *Tribolium*. *Development* **121**, 4227-4236.
- Zeitlinger, J., Zinzen, R. P., Stark, A., Kellis, M., Zhang, H., Young, R. A. and Levine, M.** (2007). Whole-genome ChIP-chip analysis of Dorsal, Twist, and Snail suggests integration of diverse patterning processes in the *Drosophila* embryo. *Genes Dev.* **21**, 385-390.
